# Supplementary material for: Differences in Organic Solute and Metabolites of Leymus chinensis in Response to Different Intensities of Salt and Alkali Stress
Source: MDPI journal article supplement (doi:10.3390/plants12091916), 2023-05-08
Supplement: s1 [file s1]

Supplementary Table S1 Contribution of *L. chinensis* metabolites to the first principal component ( PC1 ) and the second principal component ( PC2 ).

| Peak                                          | Contribution |       |
|-----------------------------------------------|--------------|-------|
|                                               | PC1          | PC2   |
| (2R,3S)-2-hydroxy-3-isopropylbutanedioic acid | 0.03         | 0.03  |
| 1,2,4-Benzenetriol                            | 0.01         | -0.04 |
| 1,2-cyclohexanedione                          | 0.08         | 0.03  |
| 1,3-diaminopropane                            | 0.03         | -0.03 |
| 1,4-cyclohexanedione                          | 0.00         | 0.04  |
| 1,5-anhydroglucitol                           | 0.00         | 0.05  |
| 11-beta-prostaglandin-F-2-alpha               | -0.02        | -0.03 |
| 1-aminocyclopropanecarboxylic acid            | 0.03         | -0.01 |
| 1-hydroxy-2-naphthoic acid                    | 0.04         | -0.05 |
| 1-indanone                                    | 0.01         | 0.02  |
| 1-methyladenosine                             | 0.06         | -0.03 |
| 1-monopalmitin                                | 0.04         | 0.03  |
| 2,2-dimethylsuccinic acid                     | 0.03         | -0.04 |
| 2,3-dihydroxypyridine                         | 0.05         | -0.02 |
| 2,3-dimethylsuccinic acid                     | 0.01         | -0.07 |
| 2,4-diaminobutyric acid                       | 0.08         | -0.06 |
| 2,6-diaminopimelic acid                       | -0.05        | -0.02 |
| 21-hydroxypregnenolone                        | 0.04         | 0.04  |
| 2-amino-3-methoxybenzoic acid                 | -0.02        | 0.02  |
| 2-butyne-1,4-diol                             | -0.05        | 0.01  |
| 2-carboxybenzaldehyde                         | 0.03         | -0.03 |
| 2-deoxyerythritol                             | 0.06         | 0.00  |
| 2'-deoxyguanosine                             | 0.05         | 0.05  |
| 2-hydroxy-3-isopropylbutanedioic acid         | 0.01         | 0.01  |
| 2-hydroxypyridine                             | 0.00         | 0.01  |
| 2-hydroxyvaleric acid                         | 0.04         | -0.02 |
| 2-indanone                                    | -0.03        | -0.08 |
| 2-ketobutyric acid                            | 0.01         | -0.02 |
| 2-ketovaleric acid                            | 0.05         | 0.02  |
| 2-methoxyestrone                              | 0.01         | -0.02 |
| 2-methylfumarate                              | 0.03         | -0.05 |
| 2-monoolein                                   | 0.05         | -0.01 |
| 2-monopalmitin                                | 0.03         | -0.01 |
| 3,4-dihydroxybenzoic acid                     | 0.03         | 0.00  |
| 3,4-dihydroxycinnamic acid                    | -0.02        | -0.02 |
| 3,6-anhydro-D-galactose                       | 0.05         | 0.01  |
| 3,7,12-trihydroxycoprostanol                  | 0.00         | -0.06 |
| 3-aminoisobutyric acid                        | 0.00         | -0.07 |
| 3-cyanoalanine                                | 0.00         | -0.08 |
| 3-hexenedioic acid                            | 0.04         | -0.07 |

|                                 |       |       |
|---------------------------------|-------|-------|
| 3-hydroxybenzaldehyde           | 0.01  | 0.03  |
| 3-hydroxybenzoic acid           | 0.00  | -0.06 |
| 3-hydroxybutyric acid           | 0.03  | 0.01  |
| 3-hydroxy-L-proline             | -0.01 | -0.06 |
| 3-hydroxynorvaline              | 0.05  | 0.05  |
| 3-hydroxypropionic acid         | 0.05  | -0.05 |
| 3-hydroxypyruvate               | 0.04  | 0.02  |
| 3-Indolepyruvic acid            | -0.03 | 0.00  |
| 3-methylamino-1,2-propanediol   | 0.05  | -0.04 |
| 3-methyloxindole                | 0.05  | -0.05 |
| 4-aminobutyric acid             | 0.01  | -0.04 |
| 4-hydroxy-3-methoxybenzoic acid | -0.01 | 0.08  |
| 4-hydroxybutyrate               | -0.03 | -0.09 |
| 4-hydroxycinnamic acid          | 0.06  | 0.03  |
| 4-vinylphenol                   | 0.06  | -0.05 |
| 4-vinylphenol dimer             | 0.02  | 0.05  |
| 5,6-dimethylbenzimidazole       | 0.07  | -0.04 |
| 5-dihydrocortisone              | 0.03  | -0.07 |
| 5-methoxytryptamine             | -0.03 | -0.05 |
| 6-phosphogluconic acid          | 0.00  | 0.07  |
| adenosine 5-monophosphate       | 0.00  | -0.07 |
| adipamide                       | 0.05  | -0.03 |
| alanine                         | -0.02 | 0.03  |
| allantoic acid                  | 0.02  | 0.04  |
| allose                          | -0.03 | 0.05  |
| alpha-ketoisocaproic acid       | 0.05  | 0.06  |
| aminomalonic acid               | -0.05 | -0.10 |
| arbutin                         | -0.06 | -0.05 |
| asparagine                      | 0.02  | 0.04  |
| aspartic acid                   | -0.01 | -0.03 |
| atropine                        | -0.05 | -0.03 |
| benzoic acid                    | 0.07  | 0.06  |
| beta-alanine                    | 0.02  | 0.01  |
| beta-mannosylglycerate          | 0.01  | -0.10 |
| caffeic acid                    | 0.01  | -0.03 |
| canavanine degr prod            | -0.02 | -0.06 |
| catechol                        | -0.01 | 0.00  |
| cellobiose                      | 0.00  | 0.00  |
| cellobiotol                     | 0.05  | -0.02 |
| cetadiol                        | -0.05 | -0.06 |
| chlorogenic Acid                | 0.00  | 0.06  |
| citraconic acid                 | 0.05  | -0.03 |
| citric acid                     | -0.07 | -0.03 |
| citrulline                      | 0.06  | -0.07 |

|                                    |       |       |
|------------------------------------|-------|-------|
| conduritol b epoxide               | 0.08  | 0.00  |
| coniferyl alcohol                  | 0.08  | 0.03  |
| corticosterone                     | 0.00  | -0.05 |
| cycloleucine                       | 0.00  | 0.00  |
| cytidine                           | 0.06  | -0.03 |
| cytidine-monophosphate degr prod   | -0.01 | -0.10 |
| cytosin                            | 0.07  | 0.01  |
| D-glycerol-1-phosphate             | -0.05 | 0.02  |
| D-glucosamine                      | 0.05  | 0.08  |
| D-altrose                          | 0.08  | 0.02  |
| D-arabitol                         | 0.04  | 0.02  |
| dehydroabietic acid                | -0.01 | 0.07  |
| D-erythroneolactone                | 0.05  | 0.05  |
| D-erythro-sphingosine              | -0.02 | -0.02 |
| D-galacturonic acid                | 0.01  | 0.00  |
| D-glucoheptose                     | 0.03  | 0.08  |
| D-glyceric acid                    | 0.06  | -0.02 |
| digalacturonic acid                | 0.08  | 0.00  |
| digitoxose                         | 0.01  | 0.04  |
| dihydroxyacetone                   | 0.03  | 0.04  |
| D-talose                           | -0.03 | -0.05 |
| erythrose                          | -0.01 | -0.03 |
| ethanolamine                       | 0.04  | -0.03 |
| ferulic acid                       | 0.02  | 0.05  |
| fructose                           | -0.06 | 0.00  |
| fructose 2,6-biphosphate degr prod | -0.04 | -0.03 |
| fumaric acid                       | 0.04  | -0.05 |
| galactinol                         | 0.07  | -0.03 |
| galactonic acid                    | 0.01  | 0.04  |
| gentiobiose                        | 0.02  | 0.02  |
| gentisic acid                      | -0.05 | 0.05  |
| glucoheptonic acid                 | -0.01 | -0.07 |
| gluconic acid                      | 0.00  | -0.01 |
| gluconic lactone                   | 0.01  | -0.02 |
| glucose                            | 0.02  | 0.01  |
| glucose-1-phosphate                | 0.07  | 0.03  |
| glutamic acid                      | 0.02  | -0.06 |
| glutamine                          | 0.08  | 0.03  |
| glutaraldehyde                     | 0.03  | -0.01 |
| glutaric Acid                      | 0.00  | 0.03  |
| glutathione - H2O                  | 0.05  | 0.00  |
| glycerol                           | 0.03  | -0.01 |
| glycine                            | 0.08  | 0.03  |
| glycolic acid                      | -0.01 | -0.03 |

|                                        |       |       |
|----------------------------------------|-------|-------|
| guanidinosuccinic acid                 | 0.00  | 0.01  |
| guanine                                | 0.04  | 0.04  |
| guanosine                              | 0.02  | 0.03  |
| hesperitin                             | -0.04 | 0.02  |
| hydroquinone                           | 0.06  | 0.03  |
| hydroxylamine                          | -0.04 | -0.05 |
| inosine                                | 0.02  | -0.03 |
| isocitric acid                         | 0.02  | -0.05 |
| isoleucine                             | 0.03  | 0.04  |
| isomaltose                             | -0.05 | 0.04  |
| isopropyl-beta-D-thiogalactopyranoside | 0.00  | 0.00  |
| itaconic acid                          | 0.07  | -0.01 |
| lactamide                              | 0.02  | 0.08  |
| lactic acid                            | -0.07 | 0.03  |
| lactobionic Acid                       | 0.01  | -0.01 |
| lactulose                              | 0.06  | -0.01 |
| L-allothreonine                        | 0.02  | 0.00  |
| L-cysteine                             | 0.06  | -0.06 |
| levoglucosan                           | 0.03  | 0.00  |
| L-homoserine                           | -0.01 | 0.01  |
| linoleic acid                          | 0.05  | 0.00  |
| L-malic acid                           | 0.05  | -0.06 |
| loganin                                | -0.02 | 0.00  |
| L-threose                              | 0.03  | 0.03  |
| luteolin                               | 0.08  | -0.04 |
| lysine                                 | 0.06  | 0.00  |
| maleamate                              | 0.00  | -0.07 |
| maleic acid                            | -0.02 | 0.06  |
| maleimide                              | 0.03  | -0.01 |
| malonic acid                           | 0.07  | -0.06 |
| maltitol                               | -0.02 | -0.06 |
| maltose                                | -0.07 | -0.03 |
| maltotriitol                           | 0.04  | -0.03 |
| maltotriose                            | 0.07  | -0.06 |
| melatonin                              | 0.02  | -0.07 |
| melezitose                             | 0.00  | -0.04 |
| melibiose                              | 0.08  | 0.01  |
| methionine                             | 0.03  | -0.05 |
| methyl phosphate                       | -0.03 | -0.06 |
| mucic acid                             | 0.01  | -0.06 |
| myo-inositol                           | 0.05  | 0.05  |
| N-2-fluorenylacetamide                 | -0.01 | -0.03 |
| N-acetyl-beta-D-mannosamine            | 0.04  | 0.06  |
| N-acetyl-D-galactosamine               | 0.03  | 0.02  |

|                           |       |       |
|---------------------------|-------|-------|
| N-acetyltryptophan        | -0.03 | -0.05 |
| naringenin                | 0.00  | -0.04 |
| naringin                  | -0.03 | -0.06 |
| N-carbamylglutamate       | 0.01  | 0.01  |
| N-cyclohexylformamide     | 0.08  | -0.03 |
| neohesperidin             | 0.01  | 0.02  |
| N-ethylglycine            | 0.01  | -0.01 |
| N-ethylmaleamic acid      | 0.05  | 0.00  |
| N-formyl-L-methionine     | 0.04  | 0.01  |
| N-methyl-DL-alanine       | -0.01 | 0.05  |
| noradrenaline             | 0.02  | 0.01  |
| nornicotine               | 0.08  | -0.06 |
| O-acetylserine            | 0.01  | 0.01  |
| o-hydroxyhippuric acid    | 0.01  | 0.01  |
| oxalacetic acid           | -0.02 | -0.02 |
| oxoproline                | 0.04  | -0.03 |
| palatinitol               | 0.02  | -0.04 |
| palatinose                | 0.01  | 0.02  |
| palmitic acid             | -0.03 | 0.00  |
| pelargonic acid           | 0.01  | -0.03 |
| phenylalanine             | 0.03  | -0.03 |
| phenylethylamine          | 0.00  | -0.02 |
| phosphate                 | 0.04  | 0.05  |
| phytosphingosine          | -0.04 | -0.05 |
| proline                   | 0.02  | -0.06 |
| prostaglandin A2          | -0.03 | -0.04 |
| pyrogallol                | 0.04  | 0.02  |
| pyrrole-2-carboxylic Acid | 0.01  | 0.01  |
| pyruvic acid              | 0.00  | 0.02  |
| quinic acid               | 0.06  | -0.08 |
| raffinose                 | -0.03 | -0.06 |
| resorcinol                | 0.03  | 0.02  |
| ribitol                   | 0.05  | -0.04 |
| ribose                    | 0.02  | 0.05  |
| salicin                   | -0.07 | -0.04 |
| salicylic acid            | 0.06  | 0.01  |
| serine                    | 0.00  | -0.01 |
| shikimic acid             | -0.02 | 0.05  |
| sorbitol                  | -0.07 | -0.03 |
| stearic acid              | 0.03  | 0.00  |
| succinic acid             | 0.01  | -0.05 |
| sucrose                   | -0.01 | 0.02  |
| sulfuric acid             | 0.03  | 0.01  |
| tartaric acid             | 0.08  | 0.02  |

|                                             |       |       |
|---------------------------------------------|-------|-------|
| tartronic acid                              | 0.03  | 0.05  |
| threitol                                    | 0.06  | -0.01 |
| threonic acid                               | 0.06  | -0.06 |
| threonine                                   | -0.01 | 0.00  |
| thymidine                                   | 0.02  | 0.01  |
| thymine                                     | 0.04  | 0.03  |
| thymol                                      | 0.04  | 0.04  |
| toluenesulfonic acid                        | 0.03  | -0.05 |
| trans-3,5-dimethoxy-4-hydroxycinnamaldehyde | 0.00  | -0.03 |
| trehalose                                   | -0.05 | 0.02  |
| trehalose-6-phosphate                       | -0.07 | -0.04 |
| tryptophan                                  | 0.02  | 0.00  |
| tyrosine                                    | 0.03  | -0.02 |
| uracil                                      | 0.01  | 0.03  |
| uridine                                     | 0.06  | -0.02 |
| valine                                      | 0.02  | -0.02 |
| xanthosine                                  | -0.02 | 0.01  |
| xylose                                      | 0.05  | -0.02 |
| zymosterol                                  | 0.02  | 0.03  |

---
