# Supplementary material for: Differences in Organic Solute and Metabolites of Leymus chinensis in Response to Different Intensities of Salt and Alkali Stress
Source: MDPI journal article supplement (doi:10.3390/plants12091916), 2023-05-08
Supplement: s1 [file s1]

Supplementary Table S2 Contents and fold change of differential metabolites in *L. chinensis* under salt and alkali stress. The value marked in red indicates that the content of this metabolite changes significantly under stress ( $p < 0.05$ ).

| Peak            | Concentration |             |           |               |           | Fold change                   |                               |                               |                               |
|-----------------|---------------|-------------|-----------|---------------|-----------|-------------------------------|-------------------------------|-------------------------------|-------------------------------|
|                 | CK            | Salt stress |           | Alkali stress |           | $\text{Log}^{(\text{MS/CK})}$ | $\text{Log}^{(\text{SS/CK})}$ | $\text{Log}^{(\text{MA/CK})}$ | $\text{Log}^{(\text{AS/CK})}$ |
|                 |               | MS          | SS        | MA            | SA        |                               |                               |                               |                               |
| GABA            | 0.05±0.04     | 0.04±0.03   | 0.00±0.00 | 0.00±0.00     | 0.00±0.00 | -0.25                         | -27.24                        | -27.20                        | -27.37                        |
| glycine         | 0.00±0.00     | 0.20±0.15   | 0.00±0.00 | 0.00±0.00     | 0.00±0.00 | 29.34                         | -0.01                         | -0.15                         | -0.15                         |
| proline         | 0.00±0.00     | 0.49±0.09   | 0.00±0.00 | 0.16±0.19     | 0.00±0.00 | 30.61                         | -0.01                         | 28.96                         | -0.15                         |
| ethanolamine    | 0.37±0.08     | 0.36±0.15   | 0.77±0.25 | 0.40±0.08     | 0.46±0.08 | -0.06                         | 1.06                          | 0.12                          | 0.30                          |
| mucic acid      | 0.01±0.00     | 0.01±0.01   | 0.00±0.01 | 0.00±0.00     | 0.01±0.01 | 0.30                          | -0.77                         | -24.90                        | 0.40                          |
| phosphate       | 0.27±0.20     | 0.43±0.17   | 0.47±0.39 | 0.57±0.10     | 0.52±0.36 | 0.68                          | 0.80                          | 1.10                          | 0.96                          |
| quinic acid     | 0.02±0.03     | 0.01±0.01   | 0.03±0.03 | 0.02±0.02     | 0.08±0.03 | -1.38                         | 0.17                          | -0.31                         | 1.86                          |
| citraconic acid | 0.07±0.02     | 0.08±0.02   | 0.08±0.02 | 0.09±0.07     | 0.14±0.01 | 0.11                          | 0.05                          | 0.24                          | 0.94                          |
| citric acid     | 0.04±0.01     | 0.04±0.03   | 0.11±0.04 | 0.10±0.05     | 0.13±0.06 | 0.13                          | 1.51                          | 1.43                          | 1.78                          |
| isocitric acid  | 0.00±0.00     | 0.06±0.07   | 0.11±0.08 | 0.00±0.00     | 0.12±0.07 | 27.50                         | 28.40                         | -0.13                         | 28.53                         |
| itaconic acid   | 0.09±0.06     | 0.05±0.02   | 0.09±0.06 | 0.12±0.10     | 0.21±0.04 | -0.95                         | 0.08                          | 0.49                          | 1.26                          |
| L-malic acid    | 0.14±0.07     | 0.07±0.02   | 0.22±0.20 | 0.21±0.18     | 0.49±0.21 | -0.89                         | 0.68                          | 0.61                          | 1.83                          |
| malonic acid    | 0.05±0.02     | 0.08±0.06   | 0.08±0.04 | 0.07±0.00     | 0.16±0.06 | 0.68                          | 0.59                          | 0.40                          | 1.66                          |
| lactic acid     | 0.03±0.04     | 0.03±0.03   | 0.11±0.05 | 0.04±0.02     | 0.13±0.07 | 0.02                          | 1.86                          | 0.38                          | 2.07                          |
| D-Glucosamine   | 0.53±0.15     | 0.42±0.14   | 0.73±0.24 | 0.89±0.08     | 0.66±0.12 | -0.33                         | 0.48                          | 0.75                          | 0.33                          |
| glycerol        | 0.46±0.10     | 0.55±0.24   | 0.71±0.15 | 0.57±0.19     | 0.64±0.09 | 0.27                          | 0.64                          | 0.32                          | 0.49                          |
| isomaltose      | 0.00±0.00     | 0.08±0.10   | 0.00±0.00 | 0.14±0.02     | 0.00±0.00 | 28.06                         | -0.01                         | 28.82                         | -0.15                         |
| lactulose       | 0.00±0.00     | 0.01±0.00   | 0.02±0.01 | 0.01±0.00     | 0.02±0.01 | 0.45                          | 1.96                          | 1.83                          | 1.93                          |
| maltotriose     | 0.07±0.02     | 0.06±0.02   | 0.04±0.03 | 0.05±0.00     | 0.02±0.03 | -0.20                         | -0.79                         | -0.45                         | -1.68                         |
| myo-inositol    | 0.14±0.09     | 0.14±0.08   | 0.21±0.06 | 0.27±0.05     | 0.21±0.10 | 0.08                          | 0.64                          | 0.97                          | 0.64                          |
